# Supplementary material for: Targeting the metabolic profile of amino acids to identify the key metabolic characteristics in cerebral palsy
Source: Front Mol Neurosci. 2023 Aug 17;16:1237745. doi: 10.3389/fnmol.2023.1237745 (PMC10470834; doi:10.3389/fnmol.2023.1237745)
Supplement: Supplementary file 1 [file Table_1.xls]

## Sheet: Supplementary Table 1
Supplementary Table 1. Average concentrations and differences of 33 amino acids in the whole, preterm birth and full term birth samples
NO	Amino Acids (Abbreviation)	Retention time（min）	Mean concentration (nmol/mL) and difference information
			Whole samples				Preterm birth samples				Full term birth samples
			CP	HC	P-value	FC	CP	HC	P-value	FC	CP	HC	P-value	FC
1	O-Phospho-L-Serine（P-Ser）	2.11	7.3	6.03	0.38	1.21	8.1	5.13	9.8*10^(-2)	1.58	6.66	6.56	0.79	1.01
2	Taurine（Tau）	2.73	188.94	158.26	0.15	1.19	212.6	142.66	3.7*10^(-2)	1.49	168.15	173.2	0.83	0.97
3	Urea（Urea）	4.44	4054.76	4203.75	0.5	0.96	4250.31	3883.68	0.43	1.09	3877.58	4363.78	9.1*10^(-2)	0.89
4	Aspartic acid（Asp）	10.37	27.64	28.36	0.43	0.97	25.39	30.15	9.0*10^(-2)	0.84	29.03	27.01	0.9	1.07
5	Hydroxy-L-Proline（Hypro）	12.87	23.3	24.2	0.45	0.96	24.1	28.5	0.18	0.85	22.57	22.29	0.69	1.01
6	Threonine（Thr）	15.18	148.53	145.43	0.93	1.02	153.95	145.79	0.94	1.06	145.85	145.25	0.95	1
7	Serine（Ser）	16.65	228.64	214.94	0.12	1.06	228.29	229.6	0.9	0.99	228.94	207.61	3.4*10^(-2)	1.1
8	Asparagine（AspNH2）	19.01	31.19	38.1	3.6*10^(-3)	0.82	30.65	36.94	4.7*10^(-2)	0.83	29.61	39.19	7.1*10^(-3)	0.76
9	Glutamic acid（Glu）	20.45	260.94	252.27	0.47	1.03	293.51	275.68	0.55	1.06	243.83	234.57	0.75	1.04
10	Glutamine（GluNH2）	22.01	344.19	365.09	0.26	0.94	322.49	350.95	0.27	0.92	360.11	371.6	0.73	0.97
11	α-Aminoadipic acid（α-AAA）	28.07	3.4	3.47	0.42	0.98	3.32	4.61	1.1*10^(-2)	0.72	3.25	3.04	0.14	1.07
12	Proline（Pro）	33.09	203.75	203.79	0.75	1	200.09	213.84	0.28	0.94	199.17	198.77	0.48	1
13	Glycine（Gly）	35.55	372.86	332.77	0.29	1.12	381.43	330.77	0.63	1.15	365.34	332.65	0.24	1.1
14	Alanine（Ala）	37.4	469.07	444.37	0.71	1.06	488.11	477.56	0.61	1.02	452.33	427.78	0.39	1.06
15	Citrulline（Cit）	39.33	32.17	34.72	9.7*10^(-2)	0.93	32.52	32.34	0.62	1.01	31.78	36.34	1.0*10^(-2)	0.87
16	α-aminobutyric acid（α-ABA）	40.66	22.28	23.26	0.57	0.96	23.57	20.37	9.8*10^(-2)	1.16	20.82	24.73	3.8*10^(-2)	0.84
17	Valine（Val）	42.8	241.41	267.62	7.8*10^(-3)	0.9	248.78	262.21	0.69	0.95	238.19	270.32	4.3*10^(-3)	0.88
18	Cystine（Cys）	43.81	2.6	5.03	6.5*10^(-3)	0.52	2.66	1.8	0.8	1.47	2.54	6.65	2.2*10^(-3)	0.38
19	Methionine（Met）	45.34	29.7	29.95	0.39	0.99	30.76	32.34	0.24	0.95	27.93	28.55	0.66	0.98
20	cystathionine（Cysthi）	46.64	1.37	1.3	0.71	1.05	1.51	1.24	0.11	1.22	1.17	1.41	1.6*10^(-2)	0.83
21	Isoleucine（Ile）	48.44	84.72	90.42	0.13	0.94	87.87	94.37	0.44	0.93	82.13	88.45	8.9*10^(-2)	0.93
22	Leucine（Leu）	50.04	163.5	171.75	0.11	0.95	174.25	178.55	0.5	0.98	151.8	168.36	2.9*10^(-2)	0.9
23	Tyrosine（Tyr）	51.53	75.56	79.51	0.17	0.95	73.5	85.33	6.2*10^(-2)	0.86	74.81	75.07	0.53	1
24	Phenylalanine（Phe）	54.33	81.95	86.68	0.31	0.95	84.13	103.86	1.4*10^(-2)	0.81	75.51	78.09	0.49	0.97
25	β-Alanine(β-Ala）	56.94	6.5	6.74	0.54	0.96	6.99	40.25	0.2	0.17	5.77	6.34	0.2	0.91
26	β-Amino-Isobutyric Acid（BAIBA）	58.12	5.49	7.2	2.9*10^(-4)	0.76	5.28	8.13	5.6*10^(-4)	0.65	5.68	6.74	4.3*10^(-2)	0.84
27	γ-Amino-n-Butyric Acid（GABA）	61.36	0.6	0.64	0.92	0.94	0.75	0.78	0.5	0.96	0.53	0.51	0.92	1.04
28	Tryptophan（Trp）	63.74	56.45	65.03	5.4*10^(-4)	0.87	57.72	72.4	6.6*10^(-4)	0.8	55.35	61.34	1.6*10^(-2)	0.9
29	Ethanolamine（EOHNH2）	65.95	28.29	26.33	0.81	1.07	33.82	21.62	0.13	1.56	23.42	28.01	9.5*10^(-2)	0.84
30	Ornithine（Orn）	73.41	125.67	119.52	0.86	1.05	125.98	123.73	0.79	1.02	125.4	114.24	0.65	1.1
31	Lysine（Lys）	74.95	191.36	199.88	0.15	0.96	203.6	203.88	0.88	1	180.59	199.46	9.5*10^(-2)	0.91
32	Histidine（His）	77.83	105.11	107.63	0.26	0.98	107.28	111.1	0.46	0.97	103.1	106.65	0.26	0.97
33	Arginine（Arg）	87.25	73.49	76.75	0.36	0.96	74.05	98.36	1.4*10^(-2)	0.75	74.01	66.87	0.83	1.11
CP and HC represent the CP group and the control group respectively.
P values and FC values were calculated by the Wilcoxon rank sum test and the division of the mean values of the two groups (CP group/control group) respectively.
